# Supplementary material for: Copper-containing POM-based hybrid P2Mo22V4Cu4 nanocluster as heterogeneous catalyst for the light-driven hydroxylation of benzene to phenol
Source: Royal Society of Chemistry journal article supplement (doi:10.1039/d3dt02812g), 2023-12-05
Supplement: d3dt02812g1.pdf [file d3dt02812g1.pdf]

## Copper-Containing POM-Based Hybrid $P_2Mo_{22}V_4Cu_4$ Nanocluster as Heterogeneous Catalyst for Light-Driven Hydroxylation of Benzene to Phenol

Qun Chen, Cheng-Yang Jiao, Hu Xu, Si-Man Li, Jian-Bo Yang, Hua Mei\* and Yan Xu\*

College of Chemical Engineering, State Key Laboratory of Materials-Oriented Chemical Engineering, Nanjing Tech University, Nanjing 211816, P.R. China.

### Section 1. Crystal Structures

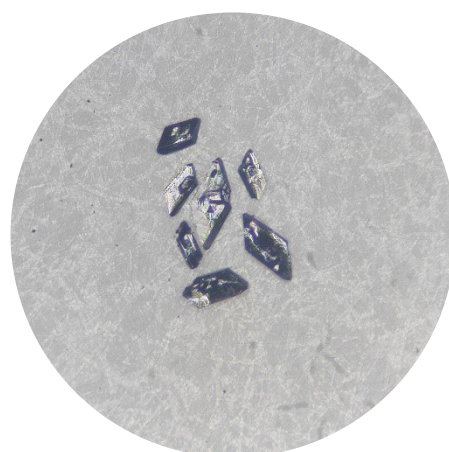

Figure. S1. The crystal image of  $P_2Mo_{22}V_4Cu_4$  under an optical microscope.

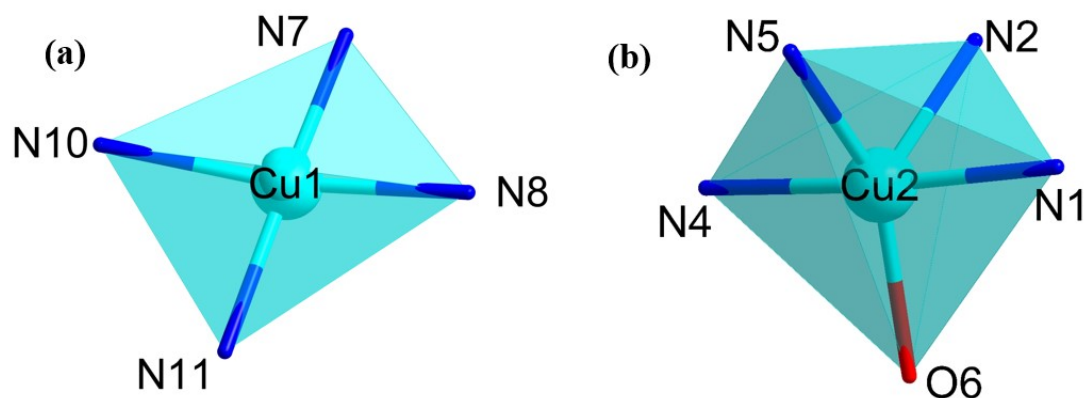

**Figure. S2.** Coordination modes of Cu1 (a) and Cu2 (b) ions in  $P_2Mo_{22}V_4Cu_4$ .

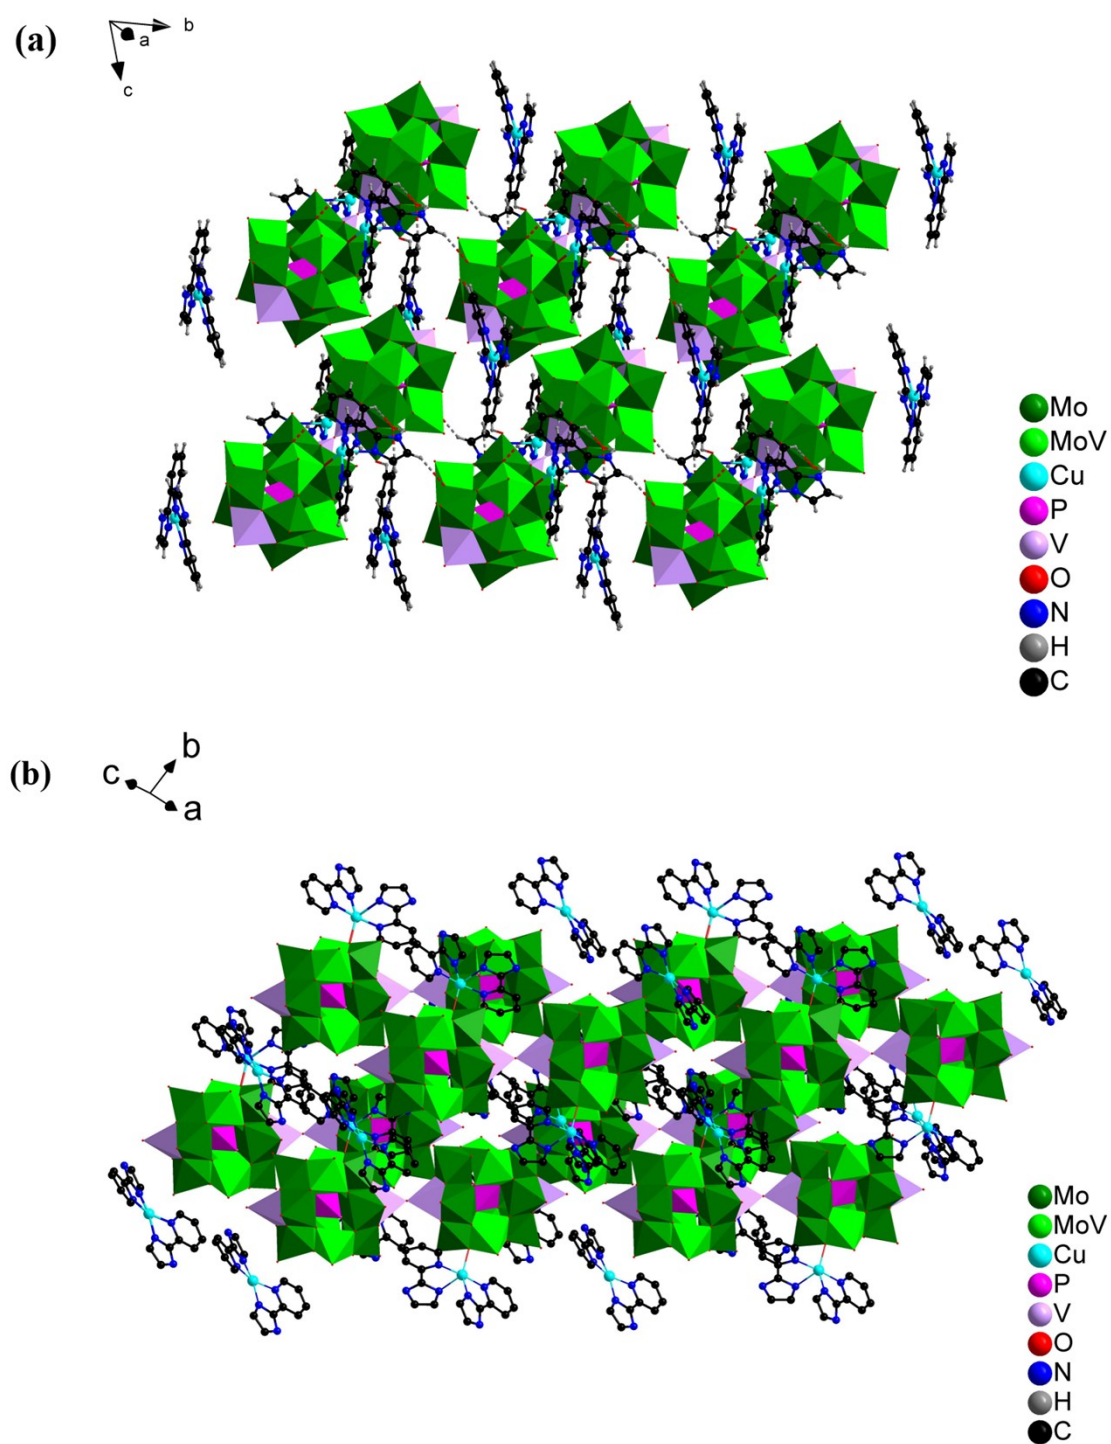

**Figure. S3.** 2D (a) and 3D (b) supramolecular architecture of  $P_2Mo_{22}V_4Cu_4$ .

## Section 2. Characterization

TG

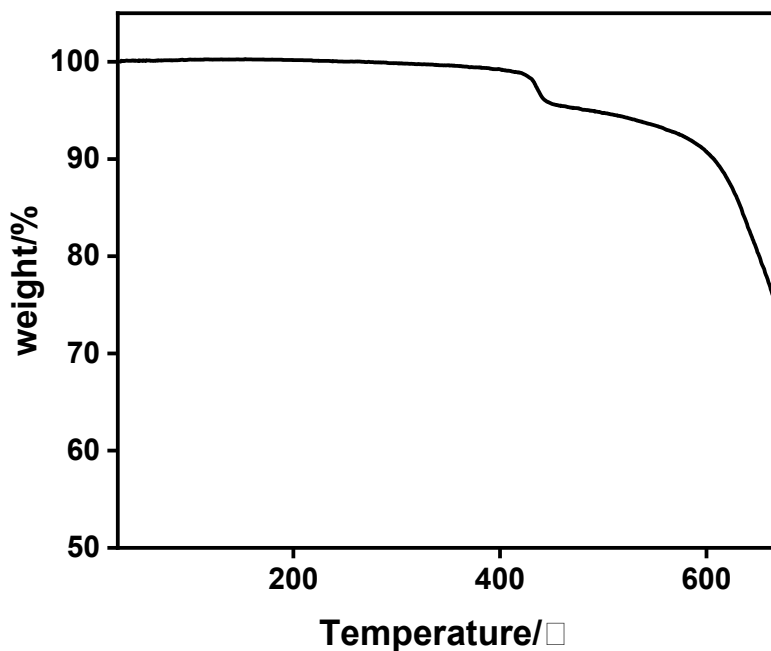

Figure. S3. The TG pattern of  $P_2Mo_{22}V_4Cu_4$ .

XPS

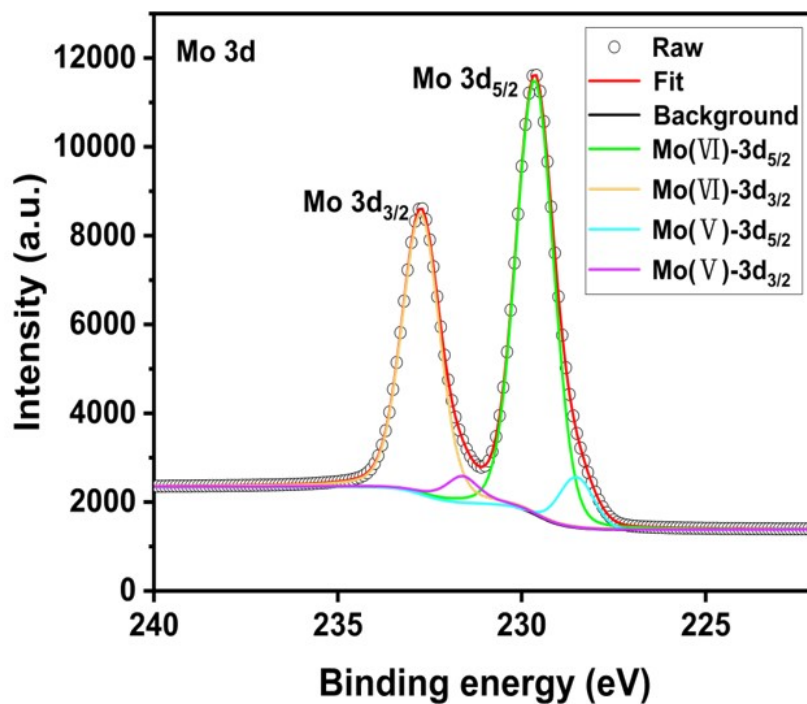

Figure. S4. The XPS binding energy of Mo 3d in the  $P_2Mo_{22}V_4Cu_4$ .

As shown in Fig.S4, the characteristic binding energies of 232.8 eV and 229.7 eV belong to  $\text{Mo}^{6+}$ , while 231.8 eV and 228.5 eV belong to  $\text{Mo}^{5+}$ . In addition, the ratio of the peak area of  $\text{Mo}^{6+} 3d_{5/2}$  to the peak area of  $\text{Mo}^{5+} 3d_{3/2}$  in the XPS spectrum is approximately 11:1. This indicates that the ratio of  $\text{Mo}^{6+}$  to  $\text{Mo}^{5+}$  is 11:1, which is consistent with the theoretical calculation results.

### UV-Vis

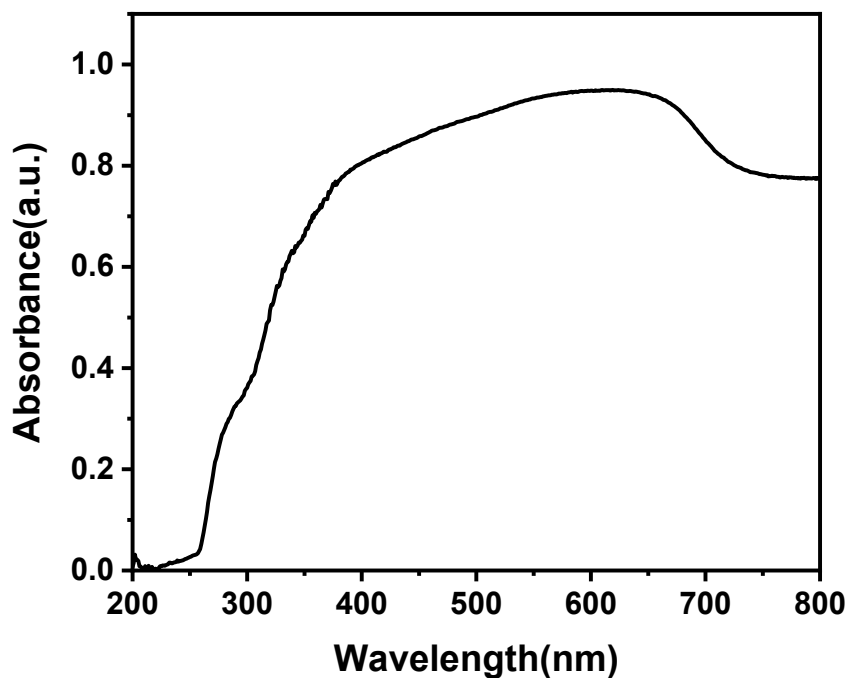

Figure. S5. The UV-vis diffuse reflectance spectra of  $\text{P}_2\text{Mo}_{22}\text{V}_4\text{Cu}_4$ .

### IR

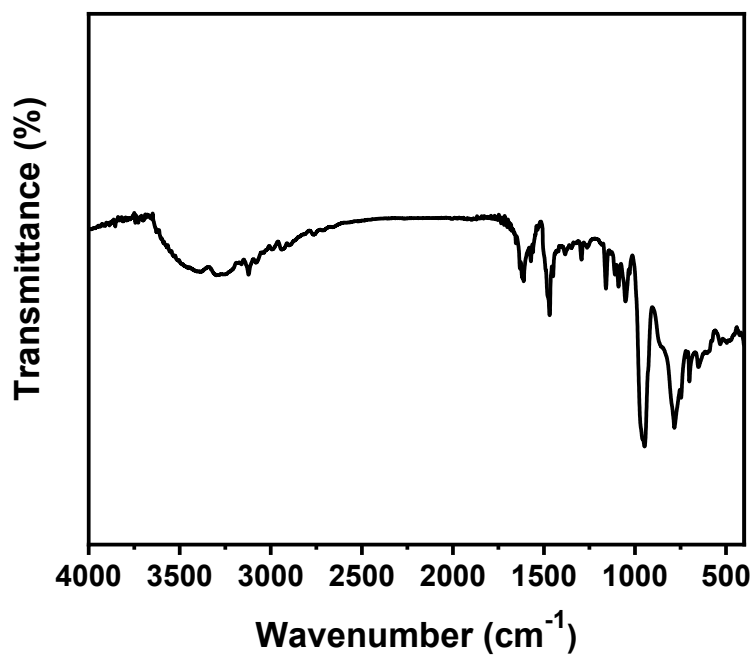

Figure. S6. FT-IR spectrum of  $P_2Mo_{22}V_4Cu_4$ .

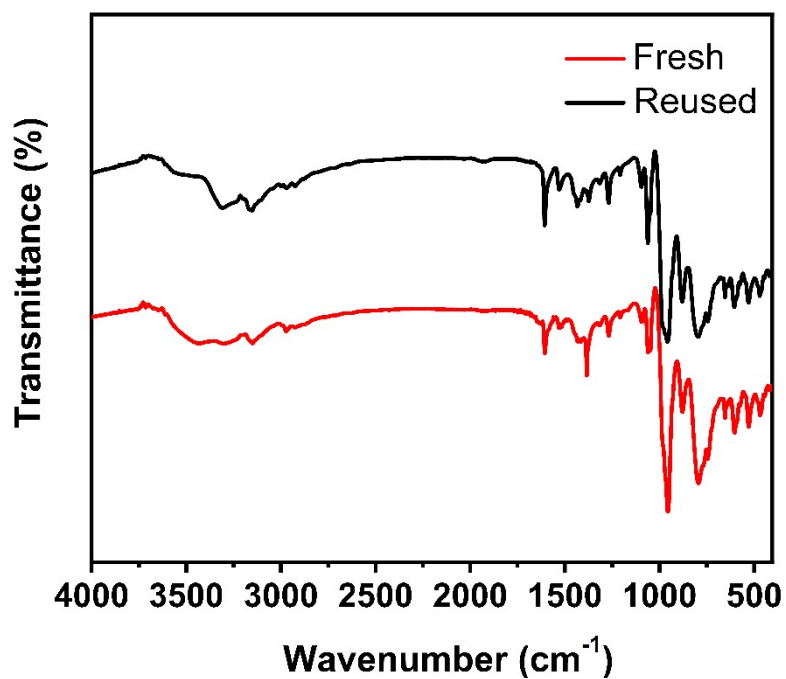

Figure. S7. FT-IR spectra of  $P_2Mo_{22}V_4Cu_4$  before and after recovery.

XRD

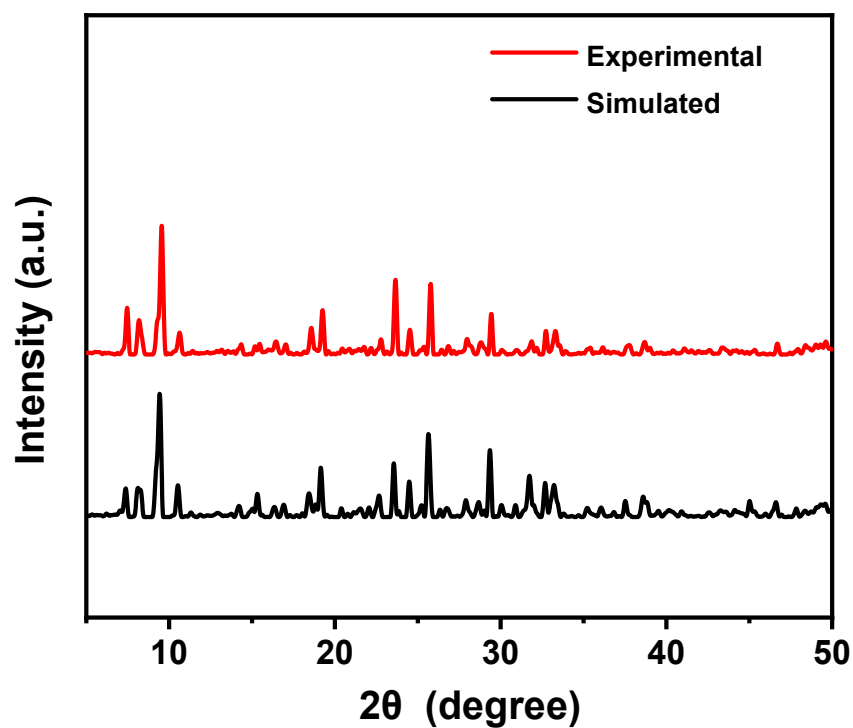

Figure. S8. The XRD patterns of  $P_2Mo_{22}V_4Cu_4$ .

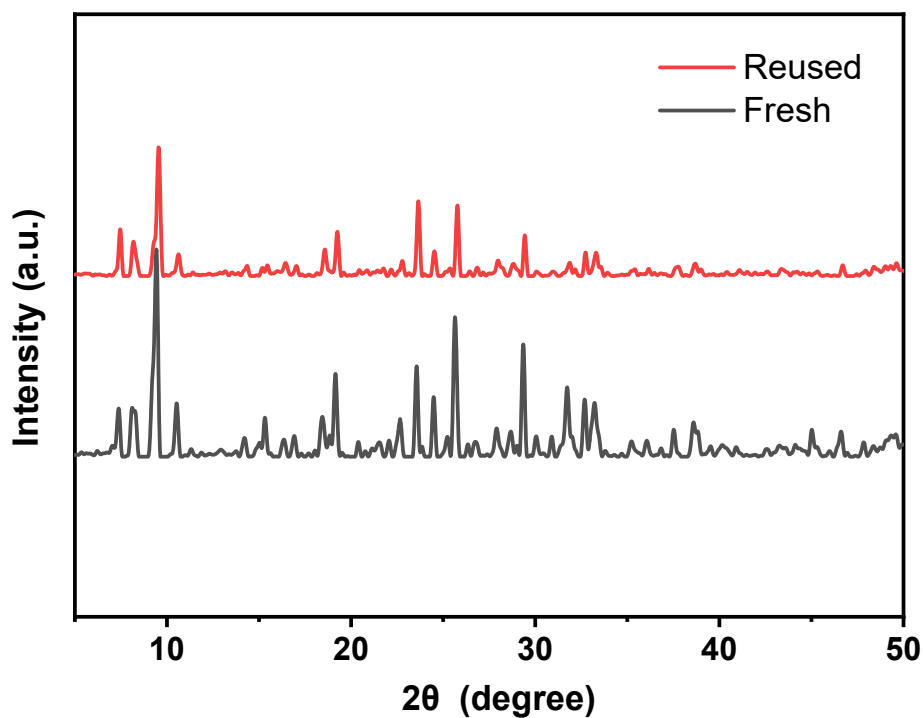

Figure. S9. The XRD patterns of  $P_2Mo_{22}V_4Cu_4$  after benzene hydroxylation.

### Section 3. Materials and Physical property studies

The heteropolyacid ( $\text{H}_5\text{PMo}_{10}\text{V}_2\text{O}_{40}$ ) were prepared according to a previously documented process and other chemicals were purchased and used without further purification. Powder X-ray diffraction PXRD tests were performed at room temperature using a Bruker D8X diffractometer equipped with monochromatic Cu K $\alpha$  radiation ( $\lambda=1.5418 \text{ \AA}$ ). Scanning electron microscopy (SEM) images and energy dispersive spectroscopy (EDS) were obtained using a Hitachi S-4800 scanning electron microscope. Nicolet Impact 410 FT-IR spectrometer was used to analyze the infrared spectrum in the range of 4000~400  $\text{cm}^{-1}$ . TG analysis was performed using a diamond thermogravimetric analyzer in a nitrogen atmosphere (25~800  $^{\circ}\text{C}$ , 10  $^{\circ}\text{C min}^{-1}$ ). X-ray photoelectron spectroscopy (XPS) was used to analyze the catalyst. Ultraviolet-visible (UV-vis) diffuse reflectance spectra in the range of 200~800 nm (barium sulfate as reference) was collected on Shimadzu UV-2600 spectrophotometer.

**Synthesis of  $\text{H}_5\text{PMo}_{10}\text{V}_2\text{O}_{40}$ :**  $\text{MoO}_3$  (7.20 g, 0.050 mol) and  $\text{V}_2\text{O}_5$  (0.91 g, 0.005 mol) were added into 100 mL highly purified water and heated to boiling with stirring. Then, 0.58 g of 85 % phosphoric acid (0.005 mmol) was diluted with 10 mL; water, titrated into the above-mentioned solution within 30 min, and heated to reflux for 24 hours. The product was collected via centrifugation and dried in a vacuum oven at 50  $^{\circ}\text{C}$ . The crude product was recrystallized from water to get orange solid powder.<sup>1</sup>

### Section 4. Investigation of benzene oxidation

After each reaction, the catalyst was recovered by centrifugation, washed several times with  $\text{C}_2\text{H}_5\text{OH}$ , followed by drying at 60  $^{\circ}\text{C}$  for 12 h before the next reaction. The conversion and selectivity were calculated according to the following equations:

$$\text{Conversion} = \frac{n_2 + n_3}{n_1} \times 100\%$$

$$\text{Phenol selectivity} = \frac{n_2}{n_2 + n_3} \times 100\%$$

$$\text{Phenol yield} = \text{Conversion} \times \text{Selectivity}$$

Note:  $n_1$ = amount of benzene added,  $n_2$ = amount of phenol formed,  $n_3$ = amount of benzoquinone formed

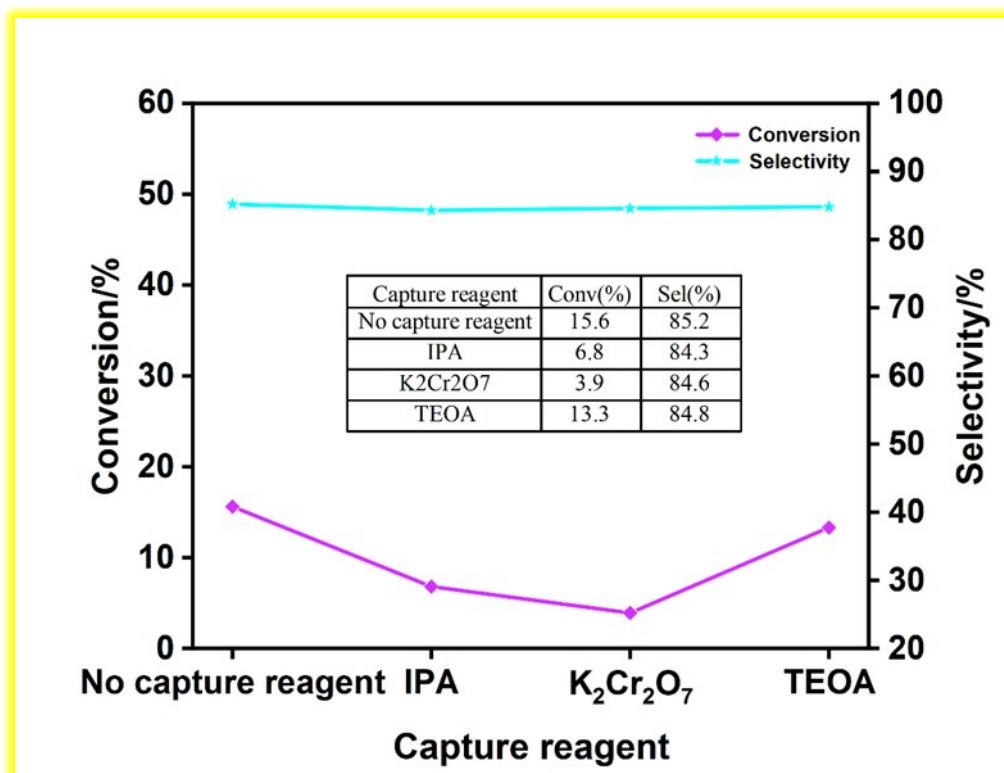

**Figure. S10.** Effect of different scavengers on the photocatalytic hydroxylation reaction of benzene.



## Section 5. Other Tables

**Table S1** Selected bond lengths (Å) and bond angles (°) for catalyst.

|             |          |              |          |
|-------------|----------|--------------|----------|
| Mo(1)-O(38) | 1.670(6) | Mo(6)-O(14)  | 1.848(6) |
| Mo(1)-O(17) | 1.862(6) | Mo(6)-O(40)  | 1.981(5) |
| Mo(1)-O(35) | 1.871(5) | Mo(6)-O(33)  | 1.989(6) |
| Mo(1)-O(15) | 1.990(5) | Mo(6)-O(32)  | 2.436(5) |
| Mo(1)-O(33) | 2.028(6) | Mo(7)-O(36)  | 1.681(6) |
| Mo(1)-O(32) | 2.444(6) | Mo(7)-O(16)  | 1.851(6) |
| Mo(2)-O(12) | 1.686(6) | Mo(7)-O(28)  | 1.875(6) |
| Mo(2)-O(4)  | 1.856(6) | Mo(7)-O(40)  | 1.994(6) |
| Mo(2)-O(9)  | 1.863(6) | Mo(7)-O(23)  | 2.003(6) |
| Mo(2)-O(37) | 1.969(6) | Mo(7)-O(13)  | 2.476(5) |
| Mo(2)-O(29) | 2.022(6) | Mo(8)-O(25)  | 1.674(6) |
| Mo(2)-O(11) | 2.447(5) | Mo(8)-O(5)   | 1.902(5) |
| Mo(3)-O(8)  | 1.678(6) | Mo(8)-O(3)   | 1.925(6) |
| Mo(3)-O(5)  | 1.873(5) | Mo(8)-O(35)  | 1.930(6) |
| Mo(3)-O(24) | 1.882(6) | Mo(8)-O(14)  | 1.983(6) |
| Mo(3)-O(7)  | 1.986(6) | Mo(8)-O(32)  | 2.517(5) |
| Mo(3)-O(37) | 2.011(6) | Mo(9)-O(22)  | 1.669(6) |
| Mo(3)-O(11) | 2.461(5) | Mo(9)-O(24)  | 1.912(5) |
| Mo(4)-O(20) | 1.671(5) | Mo(9)-O(17)  | 1.916(6) |
| Mo(4)-O(3)  | 1.878(6) | Mo(9)-O(10)  | 1.953(6) |
| Mo(4)-O(2)  | 1.880(6) | Mo(9)-O(4)   | 1.957(5) |
| Mo(4)-O(7)  | 1.957(5) | Mo(9)-O(11)  | 2.462(5) |
| Mo(4)-O(30) | 1.978(6) | Mo(10)-O(21) | 1.666(6) |
| Mo(4)-O(26) | 2.468(5) | Mo(10)-O(18) | 1.896(6) |
| Mo(5)-O(39) | 1.669(6) | Mo(10)-O(28) | 1.916(6) |
| Mo(5)-O(10) | 1.836(6) | Mo(10)-O(2)  | 1.937(6) |
| Mo(5)-O(6)  | 1.906(6) | Mo(10)-O(19) | 1.944(6) |
| Mo(5)-O(15) | 1.971(6) | Mo(10)-O(26) | 2.461(5) |
| Mo(5)-O(23) | 2.015(6) | Mo(11)-O(1)  | 1.679(6) |
| Mo(5)-O(13) | 2.429(5) | Mo(11)-O(27) | 1.876(6) |
| Mo(6)-O(34) | 1.686(6) | Mo(11)-O(18) | 1.895(6) |

---

|                   |           |                   |          |
|-------------------|-----------|-------------------|----------|
| Mo(6)-O(19)       | 1.838(6)  | O(21)-Fe(6)-O(46) | 80.6(3)  |
| Mo(11)-O(29)      | 1.956(6)  | O(17)-Mo(1)-O(33) | 154.3(2) |
| Mo(11)-O(30)      | 1.983(6)  | O(35)-Mo(1)-O(33) | 89.9(2)  |
| Mo(11)-O(26)      | 2.461(5)  | O(15)-Mo(1)-O(33) | 80.6(2)  |
| Mo(12)-O(31)      | 1.651(6)  | O(38)-Mo(1)-O(32) | 169.5(3) |
| Mo(12)-O(27)      | 1.886(6)  | O(17)-Mo(1)-O(32) | 85.6(2)  |
| Mo(12)-O(9)       | 1.911(6)  | O(35)-Mo(1)-O(32) | 74.4(2)  |
| Mo(12)-O(16)      | 1.932(6)  | O(15)-Mo(1)-O(32) | 81.9(2)  |
| Mo(12)-O(6)       | 2.037(6)  | O(33)-Mo(1)-O(32) | 71.2(2)  |
| Mo(12)-O(13)      | 2.435(5)  | O(12)-Mo(2)-O(4)  | 102.4(3) |
| Cu(1)-N(7)        | 1.985(8)  | O(12)-Mo(2)-O(9)  | 103.1(3) |
| Cu(1)-N(8)        | 1.995(8)  | O(4)-Mo(2)-O(9)   | 94.3(3)  |
| Cu(1)-N(11)       | 2.013(7)  | O(12)-Mo(2)-O(37) | 101.3(3) |
| Cu(1)-N(10)       | 2.018(8)  | O(4)-Mo(2)-O(37)  | 90.5(3)  |
| Cu(2)-N(5)        | 1.969(7)  | O(9)-Mo(2)-O(37)  | 153.5(2) |
| Cu(2)-N(1)        | 1.991(8)  | O(12)-Mo(2)-O(29) | 99.5(3)  |
| Cu(2)-N(4)        | 2.011(7)  | O(4)-Mo(2)-O(29)  | 157.6(2) |
| Cu(2)-O(6)        | 2.032(5)  | O(9)-Mo(2)-O(29)  | 84.9(2)  |
| Cu(2)-N(2)        | 2.238(8)  | O(37)-Mo(2)-O(29) | 80.9(3)  |
| V(1)-O(42)        | 1.576(10) | O(12)-Mo(2)-O(11) | 171.8(2) |
| V(1)-O(29)        | 1.908(6)  | O(4)-Mo(2)-O(11)  | 74.4(2)  |
| V(1)-O(7)         | 1.931(6)  | O(9)-Mo(2)-O(11)  | 84.9(2)  |
| V(1)-O(30)        | 2.071(7)  | O(37)-Mo(2)-O(11) | 71.4(2)  |
| V(1)-O(37)        | 2.119(7)  | O(29)-Mo(2)-O(11) | 83.3(2)  |
| V(2)-O(41)        | 1.497(3)  | O(8)-Mo(3)-O(5)   | 104.7(3) |
| V(2)-O(40)        | 1.918(7)  | O(8)-Mo(3)-O(24)  | 100.7(3) |
| V(2)-O(15)        | 1.994(7)  | O(5)-Mo(3)-O(24)  | 93.6(2)  |
| V(2)-O(23)        | 2.080(7)  | O(8)-Mo(3)-O(7)   | 102.6(3) |
| V(2)-O(33)        | 2.109(7)  | O(5)-Mo(3)-O(7)   | 85.4(2)  |
| O(38)-Mo(1)-O(17) | 104.1(3)  | O(24)-Mo(3)-O(7)  | 156.1(2) |
| O(38)-Mo(1)-O(35) | 100.5(3)  | O(8)-Mo(3)-O(37)  | 100.6(3) |
| O(17)-Mo(1)-O(35) | 94.5(2)   | O(5)-Mo(3)-O(37)  | 153.6(2) |
| O(38)-Mo(1)-O(15) | 102.6(3)  | O(24)-Mo(3)-O(37) | 89.0(3)  |
| O(17)-Mo(1)-O(15) | 85.4(2)   | O(7)-Mo(3)-O(37)  | 81.7(2)  |
| O(35)-Mo(1)-O(15) | 156.2(3)  | O(8)-Mo(3)-O(11)  | 168.8(2) |

---

---

|                   |          |                   |          |
|-------------------|----------|-------------------|----------|
| O(38)-Mo(1)-O(33) | 99.9(3)  | O(5)-Mo(3)-O(11)  | 85.1(2)  |
| O(24)-Mo(3)-O(11) | 73.0(2)  | O(19)-Mo(6)-O(14) | 94.7(3)  |
| O(7)-Mo(3)-O(11)  | 83.2(2)  | O(34)-Mo(6)-O(40) | 101.0(3) |
| O(37)-Mo(3)-O(11) | 70.5(2)  | O(19)-Mo(6)-O(40) | 86.2(2)  |
| O(20)-Mo(4)-O(3)  | 101.8(3) | O(14)-Mo(6)-O(40) | 157.8(2) |
| O(20)-Mo(4)-O(2)  | 99.9(3)  | O(34)-Mo(6)-O(33) | 99.8(3)  |
| O(3)-Mo(4)-O(2)   | 90.8(2)  | O(19)-Mo(6)-O(33) | 155.2(2) |
| O(20)-Mo(4)-O(7)  | 103.1(3) | O(14)-Mo(6)-O(33) | 89.8(3)  |
| O(3)-Mo(4)-O(7)   | 87.3(2)  | O(40)-Mo(6)-O(33) | 80.8(2)  |
| O(2)-Mo(4)-O(7)   | 156.8(2) | O(34)-Mo(6)-O(32) | 170.6(3) |
| O(20)-Mo(4)-O(30) | 101.6(3) | O(19)-Mo(6)-O(32) | 85.6(2)  |
| O(3)-Mo(4)-O(30)  | 156.2(2) | O(14)-Mo(6)-O(32) | 75.4(2)  |
| O(2)-Mo(4)-O(30)  | 89.6(3)  | O(40)-Mo(6)-O(32) | 82.6(2)  |
| O(7)-Mo(4)-O(30)  | 83.1(2)  | O(33)-Mo(6)-O(32) | 72.0(2)  |
| O(20)-Mo(4)-O(26) | 170.3(3) | O(36)-Mo(7)-O(16) | 102.1(3) |
| O(3)-Mo(4)-O(26)  | 85.5(2)  | O(36)-Mo(7)-O(28) | 102.8(3) |
| O(2)-Mo(4)-O(26)  | 73.4(2)  | O(16)-Mo(7)-O(28) | 93.5(3)  |
| O(7)-Mo(4)-O(26)  | 83.4(2)  | O(36)-Mo(7)-O(40) | 101.9(3) |
| O(30)-Mo(4)-O(26) | 71.8(2)  | O(16)-Mo(7)-O(40) | 155.6(2) |
| O(39)-Mo(5)-O(10) | 102.7(3) | O(28)-Mo(7)-O(40) | 85.3(2)  |
| O(39)-Mo(5)-O(6)  | 100.1(3) | O(36)-Mo(7)-O(23) | 101.1(3) |
| O(10)-Mo(5)-O(6)  | 94.7(2)  | O(16)-Mo(7)-O(23) | 90.4(3)  |
| O(39)-Mo(5)-O(15) | 100.6(3) | O(28)-Mo(7)-O(23) | 154.4(2) |
| O(10)-Mo(5)-O(15) | 87.5(2)  | O(40)-Mo(7)-O(23) | 80.9(2)  |
| O(6)-Mo(5)-O(15)  | 158.2(2) | O(36)-Mo(7)-O(13) | 170.7(2) |
| O(39)-Mo(5)-O(23) | 100.1(3) | O(16)-Mo(7)-O(13) | 73.3(2)  |
| O(10)-Mo(5)-O(23) | 156.0(2) | O(28)-Mo(7)-O(13) | 85.8(2)  |
| O(6)-Mo(5)-O(23)  | 88.9(2)  | O(40)-Mo(7)-O(13) | 82.2(2)  |
| O(15)-Mo(5)-O(23) | 80.7(2)  | O(23)-Mo(7)-O(13) | 71.2(2)  |
| O(39)-Mo(5)-O(13) | 170.6(3) | O(25)-Mo(8)-O(5)  | 104.3(3) |
| O(10)-Mo(5)-O(13) | 85.9(2)  | O(25)-Mo(8)-O(3)  | 104.0(3) |
| O(6)-Mo(5)-O(13)  | 75.1(2)  | O(5)-Mo(8)-O(3)   | 86.7(2)  |
| O(15)-Mo(5)-O(13) | 83.4(2)  | O(25)-Mo(8)-O(35) | 101.9(3) |
| O(23)-Mo(5)-O(13) | 72.0(2)  | O(5)-Mo(8)-O(35)  | 89.8(2)  |
| O(34)-Mo(6)-O(19) | 103.3(3) | O(3)-Mo(8)-O(35)  | 153.9(2) |

---

---

|                    |           |                    |           |
|--------------------|-----------|--------------------|-----------|
| O(34)-Mo(6)-O(14)  | 100.4(3)  | O(25)-Mo(8)-O(14)  | 101.7(3)  |
| O(5)-Mo(8)-O(14)   | 154.1(2)  | O(29)-Mo(11)-O(26) | 82.6(2)   |
| O(3)-Mo(8)-O(14)   | 87.4(2)   | O(30)-Mo(11)-O(26) | 71.9(2)   |
| O(35)-Mo(8)-O(14)  | 84.5(2)   | O(31)-Mo(12)-O(27) | 103.5(3)  |
| O(25)-Mo(8)-O(32)  | 170.7(3)  | O(31)-Mo(12)-O(9)  | 102.4(3)  |
| O(5)-Mo(8)-O(32)   | 82.8(2)   | O(27)-Mo(12)-O(9)  | 87.8(2)   |
| O(3)-Mo(8)-O(32)   | 82.2(2)   | O(31)-Mo(12)-O(16) | 101.5(3)  |
| O(35)-Mo(8)-O(32)  | 71.7(2)   | O(27)-Mo(12)-O(16) | 91.5(2)   |
| O(14)-Mo(8)-O(32)  | 71.37(19) | O(9)-Mo(12)-O(16)  | 155.6(2)  |
| O(22)-Mo(9)-O(24)  | 101.5(3)  | O(31)-Mo(12)-O(6)  | 97.7(3)   |
| O(22)-Mo(9)-O(17)  | 102.1(3)  | O(27)-Mo(12)-O(6)  | 158.8(2)  |
| O(24)-Mo(9)-O(17)  | 90.5(2)   | O(9)-Mo(12)-O(6)   | 88.4(2)   |
| O(22)-Mo(9)-O(10)  | 103.6(3)  | O(16)-Mo(12)-O(6)  | 83.5(2)   |
| O(24)-Mo(9)-O(10)  | 154.9(2)  | O(31)-Mo(12)-O(13) | 169.4(3)  |
| O(17)-Mo(9)-O(10)  | 84.9(2)   | O(27)-Mo(12)-O(13) | 86.0(2)   |
| O(22)-Mo(9)-O(4)   | 102.6(3)  | O(9)-Mo(12)-O(13)  | 82.5(2)   |
| O(24)-Mo(9)-O(4)   | 86.1(2)   | O(16)-Mo(12)-O(13) | 73.1(2)   |
| O(17)-Mo(9)-O(4)   | 155.2(2)  | O(6)-Mo(12)-O(13)  | 72.86(19) |
| O(10)-Mo(9)-O(4)   | 87.9(2)   | N(7)-Cu(1)-N(8)    | 83.0(3)   |
| O(22)-Mo(9)-O(11)  | 172.3(2)  | N(7)-Cu(1)-N(11)   | 167.7(3)  |
| O(24)-Mo(9)-O(11)  | 72.5(2)   | N(8)-Cu(1)-N(11)   | 100.3(3)  |
| O(17)-Mo(9)-O(11)  | 83.1(2)   | N(7)-Cu(1)-N(10)   | 97.9(4)   |
| O(10)-Mo(9)-O(11)  | 82.4(2)   | N(8)-Cu(1)-N(10)   | 163.1(3)  |
| O(4)-Mo(9)-O(11)   | 72.5(2)   | N(11)-Cu(1)-N(10)  | 82.3(3)   |
| O(21)-Mo(10)-O(18) | 102.0(3)  | N(5)-Cu(2)-N(1)    | 97.5(3)   |
| O(21)-Mo(10)-O(28) | 101.9(3)  | N(5)-Cu(2)-N(4)    | 82.0(3)   |
| O(18)-Mo(10)-O(28) | 90.9(2)   | N(1)-Cu(2)-N(4)    | 174.2(3)  |
| O(21)-Mo(10)-O(2)  | 101.3(3)  | N(5)-Cu(2)-O(6)    | 149.9(3)  |
| O(18)-Mo(10)-O(2)  | 87.6(2)   | N(1)-Cu(2)-O(6)    | 93.0(3)   |
| O(28)-Mo(10)-O(2)  | 156.5(2)  | N(4)-Cu(2)-O(6)    | 90.2(3)   |
| O(21)-Mo(10)-O(19) | 101.8(3)  | N(5)-Cu(2)-N(2)    | 95.1(3)   |
| O(18)-Mo(10)-O(19) | 156.2(2)  | N(1)-Cu(2)-N(2)    | 78.2(3)   |
| O(28)-Mo(10)-O(19) | 85.3(2)   | N(4)-Cu(2)-N(2)    | 96.1(3)   |
| O(2)-Mo(10)-O(19)  | 86.6(2)   | O(6)-Cu(2)-N(2)    | 114.7(3)  |
| O(21)-Mo(10)-O(26) | 172.7(3)  | O(42)-V(1)-O(29)   | 118.5(5)  |

---

|                    |           |                     |           |
|--------------------|-----------|---------------------|-----------|
| O(18)-Mo(10)-O(26) | 73.9(2)   | O(42)-V(1)-O(7)     | 125.1(5)  |
| O(29)-V(1)-O(7)    | 116.2(3)  | Mo(12)-O(13)-Mo(7)  | 86.92(17) |
| O(42)-V(1)-O(30)   | 109.9(4)  | Mo(6)-O(14)-Mo(8)   | 126.0(3)  |
| O(29)-V(1)-O(30)   | 81.8(3)   | Mo(5)-O(15)-Mo(1)   | 146.4(3)  |
| O(7)-V(1)-O(30)    | 81.3(3)   | Mo(5)-O(15)-V(2)    | 102.4(3)  |
| O(42)-V(1)-O(37)   | 105.3(4)  | Mo(1)-O(15)-V(2)    | 102.9(3)  |
| O(29)-V(1)-O(37)   | 79.9(3)   | Mo(7)-O(16)-Mo(12)  | 126.5(3)  |
| O(7)-V(1)-O(37)    | 80.3(3)   | Mo(1)-O(17)-Mo(9)   | 154.3(3)  |
| O(30)-V(1)-O(37)   | 144.8(3)  | Mo(11)-O(18)-Mo(10) | 125.7(3)  |
| O(41)-V(2)-O(40)   | 129.0(3)  | Mo(6)-O(19)-Mo(10)  | 153.1(3)  |
| O(41)-V(2)-O(15)   | 119.8(3)  | Mo(7)-O(23)-Mo(5)   | 123.0(3)  |
| O(40)-V(2)-O(15)   | 111.2(3)  | Mo(7)-O(23)-V(2)    | 95.9(3)   |
| O(41)-V(2)-O(23)   | 108.6(2)  | Mo(5)-O(23)-V(2)    | 98.0(3)   |
| O(40)-V(2)-O(23)   | 80.8(3)   | Mo(3)-O(24)-Mo(9)   | 127.2(3)  |
| O(15)-V(2)-O(23)   | 78.6(3)   | Mo(10)-O(26)-Mo(11) | 86.55(17) |
| O(41)-V(2)-O(33)   | 109.5(2)  | Mo(10)-O(26)-Mo(4)  | 87.45(17) |
| O(40)-V(2)-O(33)   | 79.2(3)   | Mo(11)-O(26)-Mo(4)  | 90.59(18) |
| O(15)-V(2)-O(33)   | 78.5(3)   | Mo(11)-O(27)-Mo(12) | 150.7(3)  |
| O(23)-V(2)-O(33)   | 141.5(3)  | Mo(7)-O(28)-Mo(10)  | 152.7(3)  |
| Mo(4)-O(2)-Mo(10)  | 126.4(3)  | V(1)-O(29)-Mo(11)   | 100.6(3)  |
| Mo(4)-O(3)-Mo(8)   | 151.0(3)  | V(1)-O(29)-Mo(2)    | 102.2(3)  |
| Mo(2)-O(4)-Mo(9)   | 125.7(3)  | Mo(11)-O(29)-Mo(2)  | 147.5(3)  |
| Mo(3)-O(5)-Mo(8)   | 153.8(3)  | Mo(4)-O(30)-Mo(11)  | 124.4(3)  |
| Mo(5)-O(6)-Cu(2)   | 125.4(3)  | Mo(4)-O(30)-V(1)    | 95.1(3)   |
| Mo(5)-O(6)-Mo(12)  | 121.8(3)  | Mo(11)-O(30)-V(1)   | 94.4(3)   |
| Cu(2)-O(6)-Mo(12)  | 111.6(3)  | Mo(6)-O(32)-Mo(1)   | 92.32(18) |
| V(1)-O(7)-Mo(4)    | 100.4(3)  | Mo(6)-O(32)-Mo(8)   | 87.17(16) |
| V(1)-O(7)-Mo(3)    | 102.4(3)  | Mo(1)-O(32)-Mo(8)   | 86.66(17) |
| Mo(4)-O(7)-Mo(3)   | 147.5(3)  | Mo(6)-O(33)-Mo(1)   | 122.4(3)  |
| Mo(2)-O(9)-Mo(12)  | 153.0(3)  | Mo(6)-O(33)-V(2)    | 96.4(3)   |
| Mo(5)-O(10)-Mo(9)  | 152.0(3)  | Mo(1)-O(33)-V(2)    | 97.7(3)   |
| Mo(2)-O(11)-Mo(3)  | 91.77(17) | Mo(1)-O(35)-Mo(8)   | 127.2(3)  |
| Mo(2)-O(11)-Mo(9)  | 87.45(16) | Mo(2)-O(37)-Mo(3)   | 124.5(3)  |
| Mo(3)-O(11)-Mo(9)  | 87.32(17) | Mo(2)-O(37)-V(1)    | 96.9(3)   |
| Mo(5)-O(13)-Mo(12) | 90.20(17) | Mo(3)-O(37)-V(1)    | 95.3(3)   |

|                               |           |                   |          |
|-------------------------------|-----------|-------------------|----------|
| Mo(5)-O(13)-Mo(7)             | 92.05(17) | V(2)-O(40)-Mo(6)  | 103.2(3) |
| V(2)-O(40)-Mo(7)              | 101.6(3)  | Mo(6)-O(40)-Mo(7) | 147.4(3) |
| V(2)-O(41)-V(2) <sup>#1</sup> | 180.0     |                   |          |

**Table S2** Hydrogen bonds for catalyst [ $\text{\AA}$  and  $^\circ$ ].

| D—H $\cdots$ A        | D—H  | H $\cdots$ A | D $\cdots$ A | D—H $\cdots$ A |
|-----------------------|------|--------------|--------------|----------------|
| N3—H3B $\cdots$ O34   | 0.86 | 2.44         | 3.045(13)    | 128            |
| N6—H6A $\cdots$ O2    | 0.86 | 2.34         | 3.076(10)    | 143            |
| N6—H6A $\cdots$ O3    | 0.86 | 2.40         | 3.160(9)     | 148            |
| N9—H9B $\cdots$ O42   | 0.86 | 1.84         | 2.694(14)    | 173            |
| N12—H12A $\cdots$ O31 | 0.86 | 2.10         | 2.939(11)    | 163            |
| C1—H1A $\cdots$ O16   | 0.93 | 2.46         | 3.105(13)    | 126            |
| C2—H2A $\cdots$ O16   | 0.93 | 2.57         | 3.217(19)    | 127            |
| C4—H4A $\cdots$ O34   | 0.93 | 2.57         | 3.319(16)    | 138            |
| C7—H7A $\cdots$ O18   | 0.93 | 2.50         | 3.327(15)    | 149            |
| C11—H11A $\cdots$ O20 | 0.93 | 2.51         | 3.393(14)    | 159            |
| C16—H16A $\cdots$ O21 | 0.93 | 2.59         | 3.159(11)    | 120            |
| C16—H16A $\cdots$ O28 | 0.93 | 2.60         | 3.434(11)    | 150            |
| C18—H18A $\cdots$ O34 | 0.93 | 2.44         | 3.222(13)    | 142            |
| C19—H19A $\cdots$ O36 | 0.93 | 2.58         | 3.221(15)    | 126            |
| C23—H23A $\cdots$ O12 | 0.93 | 2.45         | 3.369(12)    | 169            |
| C25—H25A $\cdots$ O24 | 0.93 | 2.56         | 3.192(14)    | 125            |
| C26—H26A $\cdots$ O5  | 0.93 | 2.51         | 3.178(14)    | 129            |
| C26—H26A $\cdots$ O17 | 0.93 | 2.48         | 3.300(14)    | 147            |
| C26—H26A $\cdots$ O35 | 0.93 | 2.52         | 3.211(13)    | 131            |
| C27—H27A $\cdots$ O1  | 0.93 | 2.33         | 3.055(17)    | 134            |

**Table S3** BVS analysis of compound for molybdenum atoms.

| Catalyst | Mo1  | Mo2  | Mo3  | Mo4  | Mo5  | Mo6  | Mo7  |
|----------|------|------|------|------|------|------|------|
| value    | 5.77 | 5.79 | 5.70 | 5.85 | 5.83 | 5.94 | 5.76 |

| Catalyst | Mo8  | Mo9  | Mo10 | Mo11 | Mo12 |
|----------|------|------|------|------|------|
| value    | 5.35 | 5.73 | 5.86 | 5.77 | 5.81 |

**Table S4.** The comparison of benzene hydroxylation of the reported POM-based catalysts.

| Catalyst                                                                                                                                                                                          | Time/h | T/°C | Phenol yield/% | Ref       |
|---------------------------------------------------------------------------------------------------------------------------------------------------------------------------------------------------|--------|------|----------------|-----------|
| NH <sub>2</sub> -MIL-88/PMo <sub>10</sub> V <sub>2</sub>                                                                                                                                          | 3      | 60   | 24             | 1         |
| H <sub>5</sub> PMo <sub>10</sub> V <sub>2</sub> O <sub>40</sub> /UiO-66-NH <sub>2</sub>                                                                                                           | 4      | 60   | 14.08          | 2         |
| PMo <sub>10</sub> V <sub>2</sub> /DMA16-CMPS                                                                                                                                                      | 9      | 65   | 21.9           | 3         |
| {[Cu(pyim) <sub>2</sub> (PMo <sub>10</sub> <sup>VI</sup> Mo <sup>V</sup> V <sub>2</sub> )] <sub>2</sub> ·[Cu(pyim) <sub>2</sub> ] <sub>2</sub> }                                                  | 5      | 65   | 13.29          | This work |
| [DiBimCN] <sub>2</sub> HPMoV <sub>2</sub> @NC- 580                                                                                                                                                | 17     | 140  | 10.5           | 4         |
| [(CH <sub>3</sub> ) <sub>4</sub> N] <sub>6</sub> [PMo <sub>9</sub> V <sub>3</sub> O <sub>40</sub> ][Cu <sub>2</sub> (C <sub>6</sub> H <sub>3</sub> O <sub>6</sub> ) <sub>4/3</sub> ] <sub>6</sub> | 1.33   | 80   | 9.93           | 5         |
| POM@MOF-199@SBA-15                                                                                                                                                                                | 0.33   | 80   | 6              | 6         |

## Reference

1. P. P. Xu, L. X. Zhang, X. Jia, H. Wen, X. L. Wang, S. Q. Yang and J. X. Hui, *Catal. Sci. Technol.*, 2021, **11**, 6507-6515.
2. X. Jia, F. Y. Wang, H. Wen, L. X. Zhang, S. Y. Jiao, X. L. Wang, X. Y. Pei and S. Z. Xing, *RSC Adv.*, 2022, **12**, 29433-29439.
3. H. Wang, L. Fang, Y. Yang, L. Zhang and Y. Wang, *Catal. Sci. Technol.*, 2016, **6**, 8005-8015.
4. X. Cai, Q. Wang, Y. Liu, J. Xie, Z. Long, Y. Zhou and J. Wang, *ACS Sustain. Chem. Eng.*, 2016, **4**, 4986-4996.
5. H. Yang, J. Li, L. Wang, W. Dai, Y. Lv and S. Gao, *Catal. Commun.*, 2013, **35**, 101-104.
6. H. Yang, J. Li, H. Zhang, Y. Lv and S. Gao, *Microporous and Mesoporous Materials.*, 2014, **195**, 87-91.
